# Supplementary material
Source: Springer Nature journal article supplement (https://www.springermedizin.de/resource/supplementary/12913_2009_1239_MOESM1_ESM.PDF/9527674)
Supplement: MOESM1 [file 9527674]

**HARRIS INTERACTIVE**  
5 Independence Way  
Princeton, NJ 08540

**Project Manager/Researcher: Anna Ginovker**  
**Email:** aginovker@harrisinteractive.com  
**Phone:** 609-919-2638

**Project Controller: Sarah Schreiber**  
**Email:** sschreiber@harrisinteractive.com  
**Phone:** 404-228-8933

**J31666B**  
**1/17/08**

## **Fibromyalgia Global Study - PATIENT Survey**

**CLIENT: Pfizer**

---

### **Information for Online Surveys**

|                                                                  |                                                                                      |
|------------------------------------------------------------------|--------------------------------------------------------------------------------------|
| <b>Title for initial survey page (Required for online jobs):</b> | Health Survey                                                                        |
| <b>Number of Response Equivalents (REs):</b>                     | XX                                                                                   |
| <b>Wave Number/Version/Languages (if applicable):</b>            | British English, French, German, Italian,<br>Spanish, Dutch, Mexican Spanish, Korean |
| <b>Demographics Template (Required for online jobs):</b>         | Custom                                                                               |

|                                         |
|-----------------------------------------|
| <b>SECTION 400: SCREENING QUESTIONS</b> |
|-----------------------------------------|

**BASE: ALL RESPONDENTS**

**Q404** Thank you very much for calling us! I'm \_\_\_\_\_ from Harris Interactive, a global market research firm. We invite you to participate in this telephone survey about pain to tell us about some of your experiences and opinions. Your participation will help make this important study a success.

First, may I have the ID number that your physician gave you?

[PN: 10-DIGIT NUMERIC; AT LEAST 8-DIGITS MANDATORY]

RECORD #      1  1  1  1  1  1  1  1  1  1  

**BASE: ALL RESPONDENTS**

**Q410** Which of the following categories best describes your age?  
(INTERVIEWER: IF RESPONDENT IS NOT SURE OR DECLINES TO ANSWER, PROBE TO CONFIRM RESPONDENT IS AT LEAST 18 YEARS OF AGE OR OLDER. GENTLY PROBE FOR APPROXIMATE AGE RANGE. UPDATE RESPONSE CHOICE AS NECESSARY. RESPONDENT MUST CONTINUE EVEN IF THE AGE RANGE IS NOT IDENTIFIED UNLESS THERE IS A STRONG ENOUGH REASON TO BELIEVE THAT RESPONDENT IS UNDER THE AGE OF 18.)

- |    |                       |                              |
|----|-----------------------|------------------------------|
| 1. | Under 18              | [TERMINATE AND SKIP TO Q480] |
| 2. | 18-35                 |                              |
| 3. | 36-44                 |                              |
| 4. | 45-59                 |                              |
| 5. | 60-74                 |                              |
| 6. | 75 and over           |                              |
| 8. | Not sure (V)          |                              |
| 9. | Decline to answer (V) |                              |

**BASE: ALL RESPONDENTS AGED 18+ (Q410/2-9)**

**Q412 GENDER (INTERVIEWER: RECORD GENDER. DO NOT ASK)**

1. MALE
2. FEMALE

**BASE: RESIDENT OF UK, GERMANY, FRANCE, ITALY, SPAIN, NETHERLANDS, MEXICO OR S. KOREA AND 18+ (Q455/1-8 AND Q410/2-9)**

**Q435** Has a physician diagnosed you with fibromyalgia?

- |    |                       |           |
|----|-----------------------|-----------|
| 1. | Yes                   |           |
| 2. | No                    | TERMINATE |
| 8. | Not sure (V)          | TERMINATE |
| 9. | Decline to answer (V) | TERMINATE |

**BASE: ALL RESPONDENTS**

**Q480 – INITIAL CLASSIFICATION QUESTION – BEHIND THE SCENES**

PROGRAMMER NOTE:

GET CODE 1 IF:

- 18 years or older, OR Not sure, OR Decline to answer (Q410/2-9) AND
- Reside in UK, France, Germany, Spain, Italy, Netherlands, Mexico or S. Korea (Q455/1-8) AND
- Diagnosed with fibromyalgia (Q435/1)

ALL OTHERS GET CODE 2

1. Qualified
2. Not Qualified

**BASE: ALL RESPONDENTS**

**Q485 – COUNTRY QUOTA QUESTION – BEHIND THE SCENES**

GET CODE 1 IF Q455/1  
GET CODE 2 IF Q455/2  
GET CODE 3 IF Q455/3  
GET CODE 4 IF Q455/4  
GET CODE 5 IF Q455/5  
GET CODE 6 IF Q455/6  
GET CODE 7 IF Q455/7  
GET CODE 8 IF Q455/8

- |                |       |
|----------------|-------|
| 1. UK          | N=100 |
| 2. FRANCE      | N=100 |
| 3. GERMANY     | N=100 |
| 4. ITALY       | N=100 |
| 5. SPAIN       | N=100 |
| 6. NETHERLANDS | N=100 |
| 7. MEXICO      | N=100 |
| 8. SOUTH KOREA | N=100 |

**BASE: ALL RESPONDENTS**

**Q486 - COUNTRY QUOTA CHECK QUESTION**

[PROGRAMMER NOTE: CHECK QUOTA AT Q485.]

- 1 QUOTA MET
- 2 QUOTA NOT MET
- 3 QUOTA NOT FOUND

**BASE: ALL RESPONDENTS**

**Q487 - QUOTA BY AGE AND COUNTRY QUOTA QUESTION**

GET CODE 1 IF (Q455/1 AND Q412/2 AND Q480/1)  
GET CODE 2 IF (Q455/1 AND Q412/1 AND Q480/1)  
GET CODE 3 IF (Q455/2 AND Q412/2 AND Q480/1)  
GET CODE 4 IF (Q455/2 AND Q412/1 AND Q480/1)  
GET CODE 5 IF (Q455/3 AND Q412/2 AND Q480/1)  
GET CODE 6 IF (Q455/3 AND Q412/1 AND Q480/1)  
GET CODE 7 IF (Q455/4 AND Q412/2 AND Q480/1)  
GET CODE 8 IF (Q455/4 AND Q412/1 AND Q480/1)  
GET CODE 9 IF (Q455/5 AND Q412/2 AND Q480/1)  
GET CODE 10 IF (Q455/5 AND Q412/1 AND Q480/1)  
GET CODE 11 IF (Q455/6 AND Q412/2 AND Q480/1)  
GET CODE 12 IF (Q455/6 AND Q412/1 AND Q480/1)  
GET CODE 13 IF (Q455/7 AND Q412/2 AND Q480/1)  
GET CODE 14 IF (Q455/7 AND Q412/1 AND Q480/1)  
GET CODE 15 IF (Q455/8 AND Q412/2 AND Q480/1)

GET CODE 16 IF (Q455/5 AND Q412/1 AND Q480/1)

- |     |                   |       |
|-----|-------------------|-------|
| 1.  | UK WOMEN          | N=999 |
| 2.  | UK MEN            | N=999 |
| 3.  | FRANCE WOMEN      | N=999 |
| 4.  | FRANCE MEN        | N=999 |
| 5.  | GERMANY WOMEN     | N=999 |
| 6.  | GERMANY MEN       | N=999 |
| 7.  | ITALY WOMEN       | N=999 |
| 8.  | ITALY MEN         | N=999 |
| 9.  | SPAIN WOMEN       | N=999 |
| 10. | SPAIN MEN         | N=999 |
| 11. | NETHERLANDS WOMEN | N=999 |
| 12. | NETHERLANDS MEN   | N=999 |
| 13. | MEXICO WOMEN      | N=999 |
| 14. | MEXICO MEN        | N=999 |
| 15. | S. KOREA WOMEN    | N=999 |
| 16. | S. KOREA MEN      | N=999 |

**BASE: ALL RESPONDENTS**

**Q489** - QUOTA BY AGE AND COUNTRY QUOTA CHECK QUESTION  
[PROGRAMMER NOTE: CHECK QUOTA AT Q487.]

- |   |                 |
|---|-----------------|
| 1 | QUOTA MET       |
| 2 | QUOTA NOT MET   |
| 3 | QUOTA NOT FOUND |

**BASE: ALL RESPONDENTS**

**Q99** SCREENER QUALIFICATION IDENTIFICATION QUESTION (DOES NOT APPEAR ON SCREEN)

[PN: GET CODE 1 IF Q480/1 AND Q485/1-8 AND Q486/2, 3 AND Q487/1-16 AND Q489/2, 3. GET CODE 3 IF Q480/1 AND Q485/1-8 AND Q486/1 AND Q487/1-16 AND Q489/1. ALL OTHERS GET CODE 6.

- |   |                                              |
|---|----------------------------------------------|
| 1 | SCREENER QUALIFIED RESPONDENTS, QUOTA OPEN   |
| 3 | SCREENER QUALIFIED RESPONDENTS, QUOTA CLOSED |
| 6 | NOT SCREENER QUALIFIED                       |

|                                                              |
|--------------------------------------------------------------|
| <b>SECTION 500: MAIN QUESTIONNAIRE—FIBROMYALGIA SYMPTOMS</b> |
|--------------------------------------------------------------|

Now, I am going to ask you some questions about your fibromyalgia symptoms.

**BASE: ALL QUALIFIED RESPONDENTS (Q99/1)**

**Q500** Please indicate which of the following symptoms of fibromyalgia you have experienced.  
(INTERVIEWER READ LIST. ALLOW MULTIPLE RESPONSES.)

[RANDOMIZE]

1. Chronic widespread pain
2. Problems sleeping
3. Fatigue
4. Headaches
5. Facial pain
6. Heightened sensitivity to touch
7. Difficulty concentrating
8. Numbness and/or tingling sensations
9. Feelings of anxiety
10. Feelings of depression
11. Joint pain
12. Stiffness
13. Leg cramps
14. Low back pain
96. Other [ANCHOR]
97. None of these [ANCHOR, E]
98. Not sure (V, E)
99. Decline to answer (V, E)

**BASE: QUALIFIED RESPONDENTS WHO MENTIONED AT LEAST ONE LISTED SYMPTOM (Q500/1-14,96)**

**Q510** Please tell me how disruptive each of these symptoms is to the overall quality of your life. Would you say it is not at all disruptive, not very disruptive, fairly disruptive, very disruptive, or extremely disruptive? (INTERVIEWER: READ LIST AND REPEAT SCALE IF NECESSARY.)

[PROGRAMMER: DISPLAY ONLY SYMPTOMS THAT RESPONDENT MENTIONED IN Q500.]

**Q511**

|                          |                        |                      |                    |                         |                 |                          |
|--------------------------|------------------------|----------------------|--------------------|-------------------------|-----------------|--------------------------|
| 1                        | 2                      | 3                    | 4                  | 5                       | 8               | 9                        |
| Not at all<br>disruptive | Not very<br>disruptive | Fairly<br>disruptive | Very<br>disruptive | Extremely<br>disruptive | Not<br>Sure (V) | Decline<br>to Answer (V) |

[RANDOMIZE]

1. Chronic widespread pain
2. Problems sleeping
3. Fatigue
4. Headaches
5. Facial pain
6. Heightened sensitivity to touch
7. Difficulty concentrating
8. Numbness and/or tingling sensations
9. Feelings of anxiety
10. Feelings of depression
11. Joint pain
12. Stiffness
13. Leg cramps
14. Low back pain
96. Other

**BASE: RESPONDENTS WHO HAVE EXPERIENCED CHRONIC WIDESPREAD PAIN (Q500/1)**

**Q515** In a typical week, how often would you say you experience chronic widespread pain from fibromyalgia? Would you say...? (INTERVIEWER: READ LIST)

1. Less than once a week
2. Once a week
3. 2 to 3 times per week
4. 4 to 5 times per week
5. Every day
8. Not sure (V)
9. Decline to answer (V)

**BASE: RESPONDENTS WHO HAVE EXPERIENCED CHRONIC WIDESPREAD PAIN (Q500/1)**

**Q520** In general, how severe is the chronic widespread pain you experience from your fibromyalgia? Please use a scale from 0-10, where '0' means no pain and '10' means the worst pain imaginable.

1. 0 – No pain
2. 1
3. 2
4. 3
5. 4
6. 5
7. 6
8. 7
9. 8
10. 9
11. 10 – Worst pain
- 98 Not sure (V)
- 99 Decline to answer (V)

**BASE: ALL QUALIFIED RESPONDENTS (Q99/1)**

**Q525** How long ago did you first notice the symptoms of fibromyalgia?

(INTERVIEWER: RECORD LENGTH OF TIME AS INDICATED BY RESPONDENT.

- IF RESPONDENT PROVIDES RESPONSE THAT IS LESS THAN ONE MONTH, I.E 3 WEEKS, RECORD AS ONE MONTH.)

\_\_ \_\_ year(s) (Example: 03)  
\_\_ \_\_ month(s) (Example: 10)  
[YEARS AND MONTHS MANDATORY (DOUBLE DIGIT)]  
[RANGE: 00-95]

98 – Not Sure (V, E)  
99 – Decline to Answer (V, E)

**BASE: ALL QUALIFIED RESPONDENTS (Q99/1)**

**Q530** How long did it take you to see a physician after you first experienced your fibromyalgia symptoms?

(INTERVIEWER: RECORD LENGTH OF TIME AS INDICATED BY RESPONDENT.

- IF RESPONDENT PROVIDES RESPONSE THAT IS LESS THAN ONE WEEK, I.E 5 DAYS, RECORD AS ONE WEEK.)

\_\_ \_\_ year(s) (Example: 03)  
\_\_ \_\_ month(s) (Example: 10)  
\_\_ \_\_ week(s) (Example: 01)  
[YEARS, MONTHS, AND WEEKS MANDATORY (DOUBLE DIGIT)]  
[RANGE: 00-95]

98 Not Sure (V, E);  
99 Decline to Answer (V, E)

**BASE: WAITED 4 WEEKS OR LONGER (Q537/4 WEEKS OR MORE)**

**Q535** I am going to read you a list of reasons why some people wait before seeing a physician about their symptoms. For each reason, please tell me whether or not it was a reason you waited before seeing a physician. (INTERVIEWER: READ EACH STATEMENT FROM THE LIST BELOW AND AFTER EACH STATEMENT SAY: 'Was it a reason?')

| Yes | No | Not Sure | Decline to Answer |
|-----|----|----------|-------------------|
| 1   | 2  | 8        | 9                 |

[RANDOMIZE]

1. The symptoms were not severe enough
2. You were afraid that your physician would not take you seriously
3. You thought the symptom(s) might go away by themselves
4. You do not like going to a physician
5. You do not like receiving treatments like medications or injections
6. You were concerned about the cost of a physician visit or treatment
7. You were too busy
8. It was difficult to schedule an appointment with the physician
9. You thought you could manage the symptoms yourself



|                                                                                             |
|---------------------------------------------------------------------------------------------|
| <b>SECTION 600: MAIN QUESTIONNAIRE—FIBROMYALGIA DIAGNOSIS/ATTITUDES TOWARD FIBROMYALGIA</b> |
|---------------------------------------------------------------------------------------------|

Now I am going to ask you some questions about your fibromyalgia diagnosis.

**BASE: ALL QUALIFIED RESPONDENTS (Q99/1)**

**Q600** From the time you first saw a physician about the symptoms you were experiencing, how long did it take before you were diagnosed with fibromyalgia?

(INTERVIEWER: RECORD LENGTH OF TIME AS INDICATED BY RESPONDENT.)

- IF RESPONDENT PROVIDES RESPONSE THAT IS LESS THAN ONE WEEK, I.E 5 DAYS, RECORD AS ONE WEEK.)

\_\_\_ year(s) (Example: 03)

\_\_\_ month(s) (Example: 10)

\_\_\_ week(s) (Example: 01)

[YEARS, MONTHS, AND WEEKS MANDATORY (DOUBLE DIGIT)]

[RANGE: 00-95]

\_\_\_\_\_ 97- Diagnosed on first visit to a physician about my symptoms (V, E)

\_\_\_\_\_ 98 – Not Sure (V, E)

\_\_\_\_\_ 99 – Decline to Answer (V, E)

[PN: IF Q600/NE 97 CONTINUE WITH Q605. IF Q600/97 SKIP TO Q610.]

**BASE: NOT DIAGNOSED ON FIRST VISIT (Q600/NE 97)**

**Q605** All together, how many physicians did you see to receive your fibromyalgia diagnosis?

(INTERVIEWER: ENTER 98 FOR NOT SURE, 99 FOR DECLINE TO ANSWER)

\_\_\_ physicians [RANGE: 1-95; 98, 99]

**BASE: ALL QUALIFIED RESPONDENTS (Q99/1)**

**Q610** From the time you first saw a physician about your symptoms and up until now, what type(s) of physicians did you see about your symptoms of fibromyalgia? (INTERVIEWER: READ LIST. ALLOW MULTIPLE RESPONSES.)

1. General Practitioner/Family Practitioner
2. Internist/Internal Medicine
3. OBGYN
4. Rheumatologist
5. Neurologist
6. Psychiatrist
7. Pain Specialist
8. Orthopedist
9. Physical Therapist
10. Anesthesiologist
96. Other
98. Not sure (V, E)
99. Decline to answer (V, E)

**BASE: ALL QUALIFIED RESPONDENTS (Q99/1)**

**Q616** What kind of physician diagnosed you with fibromyalgia? (INTERVIEWER: READ LIST IF NECESSARY. SINGLE RESPONSE.)

1. General Practitioner/Family Practitioner
2. Internist/Internal Medicine
3. OBGYN
4. Rheumatologist
5. Neurologist
6. Psychiatrist
7. Pain Specialist
8. Orthopedist
9. Physical Therapist
10. Anesthesiologist
96. Other
98. Not sure (V, E)
99. Decline to answer (V, E)

**BASE: ALL QUALIFIED RESPONDENTS (Q99/1)**

**Q623** What kind of physician is currently treating your fibromyalgia? (INTERVIEWER: READ LIST IF NECESSARY. MULTIPLE RESPONSE.)

1. General Practitioner/Family Practitioner
2. Internal Medicine/Internist
3. OBGYN
4. Rheumatologist
5. Neurologist
6. Psychiatrist
7. Pain Specialist
8. Orthopedist
9. Physical Therapist
10. Anesthesiologist
96. Other
98. Not sure (V, E)
99. Decline to answer (V, E)

**BASE: ALL QUALIFIED RESPONDENTS (Q99/1)**

**Q625** Overall, how easy or how difficult was your experience in receiving a fibromyalgia diagnosis? Would you say...? (INTERVIEWER: READ LIST)

1. Very easy
2. Somewhat easy
3. Neither easy nor difficult
4. Somewhat difficult
5. Very difficult
8. Not sure (v)
9. Decline to answer (v)

**BASE: ALL QUALIFIED RESPONDENTS (Q99/1)**

**Q640** Now, I am going to read you several general statements about fibromyalgia. Based on your personal experience being diagnosed and treated for fibromyalgia, please indicate if you strongly agree, somewhat agree, neither agree nor disagree, somewhat disagree or strongly disagree with each of the following statements. (INTERVIEWER: READ LIST. REPEAT SCALE IF NECESSARY.)

**Q641**

| Strongly<br>Agree | Somewhat<br>Agree | Neither Agree<br>Nor Disagree | Somewhat<br>Disagree | Strongly<br>Disagree | Not<br>Sure<br>(V) | Decline to<br>Answer<br>(V) |
|-------------------|-------------------|-------------------------------|----------------------|----------------------|--------------------|-----------------------------|
| 1                 | 2                 | 3                             | 4                    | 5                    | 8                  | 9                           |

[RANDOMIZE]

1. Physicians are well trained to diagnose and treat fibromyalgia
2. Physicians are compassionate with their fibromyalgia patients
3. Fibromyalgia patients have had at least one experience where a physician did not take them seriously
4. Physicians need to spend more time with patients to identify fibromyalgia
5. Physicians think that fibromyalgia patients exaggerate their symptoms
6. Fibromyalgia patients find it difficult to communicate their symptoms to physicians
7. Physicians need to focus more on fibromyalgia symptoms

**BASE: ALL QUALIFIED RESPONDENTS (Q99/1)**

**Q645** Thinking about all of the physicians you have seen about your fibromyalgia symptoms, overall, how caring do you feel they have been towards you? Would you say...?

1. Extremely caring
2. Very caring
3. Fairly caring
4. Not very caring
5. Not at all caring
8. Not sure (V)
9. Decline to answer (V)

**BASE: ALL QUALIFIED RESPONDENTS (Q99/1)**

**Q650** In a typical month, how often do you visit a physician about your fibromyalgia symptoms? Would you say...?

1. Less than once a month
2. Once a month
3. Twice a month
4. Three times per month or more
8. Not sure (V)
9. Decline to answer (V)

|                                                                   |
|-------------------------------------------------------------------|
| <b>SECTION 700: MAIN QUESTIONNAIRE— IMPACT ON QUALITY OF LIFE</b> |
|-------------------------------------------------------------------|

**BASE: ALL QUALIFIED RESPONDENTS (Q99/1)**

**Q705** Now I am going to read out a list of some aspects of your life that may have been impacted by fibromyalgia. For each aspect, please tell me if fibromyalgia has had a very strong impact, strong impact, moderate impact, slight impact or no impact?

(INTERVIEWER: READ OUT LIST AND REPEAT SCALE IF NECESSARY.)

**Q706**

|                            |                       |                         |                       |                   |                      |                               |
|----------------------------|-----------------------|-------------------------|-----------------------|-------------------|----------------------|-------------------------------|
| Very Strong<br>Impact<br>1 | Strong<br>Impact<br>2 | Moderate<br>Impact<br>3 | Slight<br>Impact<br>4 | No<br>Impact<br>5 | Not<br>Sure (V)<br>8 | Decline to<br>Answer (V)<br>9 |
|----------------------------|-----------------------|-------------------------|-----------------------|-------------------|----------------------|-------------------------------|

[RANDOMIZE]

1. Overall quality of your life [ANCHOR]
2. Your personal relationships
3. Your ability to keep commitments or appointments
4. Your ability to participate in hobbies
5. Your ability to care for family members and children
6. Your sex life
7. Your physical mobility
8. Your overall mood
9. Your concentration or memory
10. Your motivation or drive

**BASE: ALL QUALIFIED RESPONDENTS (Q99/1)**

**Q715** If you had to estimate, how many days of work did you miss over the past 12 months because of your fibromyalgia? (INTERVIEWER: READ OUT LIST.)

1. None – you have not missed any days
2. 1 to 9 days
3. 10 to 20 days
4. 21 to 40 days
5. More than 40 days
6. You have not been employed in the past 12 months
8. Not sure (V)
9. Decline to answer (V)

**BASE: ALL QUALIFIED RESPONDENTS (Q99/1)**

**Q726** Please tell me whether each of the following statements applies to you? (INTERVIEWER: READ LIST.)

**Q727**

| Applies to You | Doesn't Apply to You | Not Sure (V) | Decline to Answer (V) |
|----------------|----------------------|--------------|-----------------------|
| 1              | 2                    | 8            | 9                     |

[RANDOMIZE]

1. Due to your fibromyalgia you are not able to work and do not earn an income
2. Due to your fibromyalgia you can only work sometimes and do not earn as much as you used to earn
3. You lost your job due to your fibromyalgia
4. You have spent a lot of money out-of-pocket on medical care due to your fibromyalgia
5. You have been held back in your career due to your fibromyalgia
6. You have paid out-of-pocket for assistance in performing daily activities due to your fibromyalgia

**BASE: ALL QUALIFIED RESPONDENTS (Q99/1)**

**Q731** Now I would like to ask you about the level of understanding your family and friends have expressed towards your condition. Would you say your family and friends have been extremely understanding, very understanding, fairly understanding, not very understanding or not at all understanding about the following? (INTERVIEWER: READ OUT LIST. REPEAT SCALE IF NECESSARY.)

**Q732**

| Extremely Understanding | Very Understanding | Fairly Understanding | Not Very Understanding | Not At All Understanding | Not Sure (V) | Decline to Answer (V) |
|-------------------------|--------------------|----------------------|------------------------|--------------------------|--------------|-----------------------|
| 1                       | 2                  | 3                    | 4                      | 5                        | 8            | 9                     |

[RANDOMIZE]

1. Your fibromyalgia overall [ANCHOR]
2. You staying home from a family outing due to your fibromyalgia
3. You taking a sick day at work due to your fibromyalgia
4. You needing help with daily chores due to your fibromyalgia
5. You needing to discuss your fibromyalgia with your family and friends

|                                                                |
|----------------------------------------------------------------|
| <b>SECTION 800: MAIN QUESTIONNAIRE— FIBROMYALGIA TREATMENT</b> |
|----------------------------------------------------------------|

Now I'm going to ask you some questions about how your fibromyalgia is treated.

**BASE: ALL QUALIFIED RESPONDENTS (Q99/1)**

**Q800** What treatments are you currently using to treat your fibromyalgia? (INTERVIEWER READ LIST. ALLOW MULTIPLE RESPONSES.)

[RANDOMIZE]

1. Pain reliever(s) you can buy over-the-counter, without a prescription
2. Pain reliever(s) prescribed by your physician
3. Other drug(s) prescribed by your physician
4. Sleep aids
5. Counseling with a mental health professional
6. Relaxation techniques
7. Biofeedback
8. Lifestyle changes
9. Exercise
96. Other [ANCHOR]
97. None (V) [ANCHOR, E]
98. Not sure (V)[ANCHOR, E]
99. Decline to answer (V) [ANCHOR, E]

[PN: IF Q800/1-9, 96 CONTINUE WITH Q805. IF Q800/97, 98, 99 SKIP TO Q900.]

**BASE: CURRENTLY USING AT LEAST ONE OF THE LISTED TREATMENTS (Q800/1-9, 96)**

**Q805** How satisfied are you with your current overall treatment's ability to relieve your fibromyalgia symptoms? Would you say...? (INTERVIEWER: READ LIST.)

1. Extremely satisfied
2. Very satisfied
3. Fairly satisfied
4. Not very satisfied
5. Not at all satisfied
8. Not sure (V)
9. Decline to answer (V)

**BASE: QUALIFIED RESPONDENTS WHO MENTIONED AT LEAST ONE LISTED SYMPTOM AND CURRENTLY USE AT LEAST ONE OF THE LISTED TREATMENTS (Q500/1-14,96 AND Q800/1-9, 96)**

**Q810** Of the fibromyalgia symptoms that you have experienced, which ones, if any, do you feel are not well managed by your current treatment? (INTERVIEWER: READ LIST. ALLOW MULTIPLE RESPONSES.)

[PN: PROGRAMMER: DISPLAY ONLY SYMPTOMS THAT RESPONDENT MENTIONED IN Q500.]

[RANDOMIZE]

1. Chronic widespread pain
2. Problems sleeping
3. Fatigue
4. Headaches
5. Facial pain
6. Heightened sensitivity to touch
7. Difficulty concentrating
8. Numbness and/or tingling sensations
9. Feelings of anxiety
10. Feelings of depression
11. Joint pain
12. Stiffness
13. Leg cramps
14. Low back pain
96. Other [ANCHOR]
97. None (V) [ANCHOR, E]
98. Not sure (V) [ANCHOR, E]
99. Decline to answer (V) [ANCHOR, E]

|                               |
|-------------------------------|
| <b>SECTION1000: THANK YOU</b> |
|-------------------------------|

**BASE: QUALIFIED PATIENTS (Q99/1)**

**Q299** Those are all the questions we have for you. Thank you very much for participating in this survey. Have a great day.

**BASE: ALL RESPONDENTS**

**Q59** STATUS OF RESPONDENT (LABELS USED IN ICW SAMPLE DISPOSITION REPORTS)

|     |                              |
|-----|------------------------------|
| 29  | OVER QUOTA (Q99/3)           |
| 41  | SCREENER REFUSAL #1 (TBD)    |
| 44  | SCREENER REFUSAL #4 (Q435/9) |
| 61  | NOT QUALIFIED #1 (Q410/1)    |
| 63  | NOT QUALIFIED #3 (Q435/2,8)  |
| 999 | COMPLETE (Q99/1)             |

**BASE: ALL RESPONDENTS**

**Q60** STATUS OF RESPONDENT (DOES NOT APPEAR ON SCREEN)

[PN: GET CODES AT Q99]

|   |                                               |
|---|-----------------------------------------------|
| 1 | QUALIFIED RESPONDENTS, QUOTA OPEN             |
| 2 | PARTIALLY QUALIFIED, QUOTA OPEN               |
| 3 | QUALIFIED RESPONDENTS, QUOTA CLOSED           |
| 4 | PARTIALLY QUALIFIED RESPONDENTS, QUOTA CLOSED |
| 5 | OVERALL QUOTA CLOSED                          |
| 6 | NOT QUALIFIED                                 |
